# Supplementary material
Source: PubMed Central journal article supplement (PMC2834492)
Supplement: NIHMS179688-supplement-pdf.pdf [file NIHMS179688-supplement-pdf.pdf]

**Detection of VM55599 and Pre-paraherquamide from *Aspergillus japonicus* and  
*Penicillium fellutanum*: Biosynthetic Implications**

***SUPPORTING INFORMATION***

*Yousong Ding,<sup>†</sup> Sabine Gruschow,<sup>†</sup> Thomas J. Greshock,<sup>‡</sup> Jennifer M. Finefield,<sup>‡</sup> David  
H. Sherman,<sup>†</sup> and Robert M. Williams<sup>\*,‡,§</sup>*

Center for Chemical Genomics, Life Sciences Institute, The University of Michigan,  
210 Washtenaw Avenue, Ann Arbor, MI 48109-2216,  
Department of Chemistry, Colorado State University, Fort Collins, CO 80523,  
and University of Colorado Cancer Center, Aurora, CO 80045

---

\* To whom correspondence should be addressed. Tel: (970) 491-6747. Fax: (970) 491-3944. E-mail: rmw@lamar.colostate.edu.

<sup>†</sup>Center for Chemical Genomics, The University of Michigan.

<sup>‡</sup>Department of Chemistry, Colorado State University.

<sup>§</sup>University of Colorado Cancer Center.

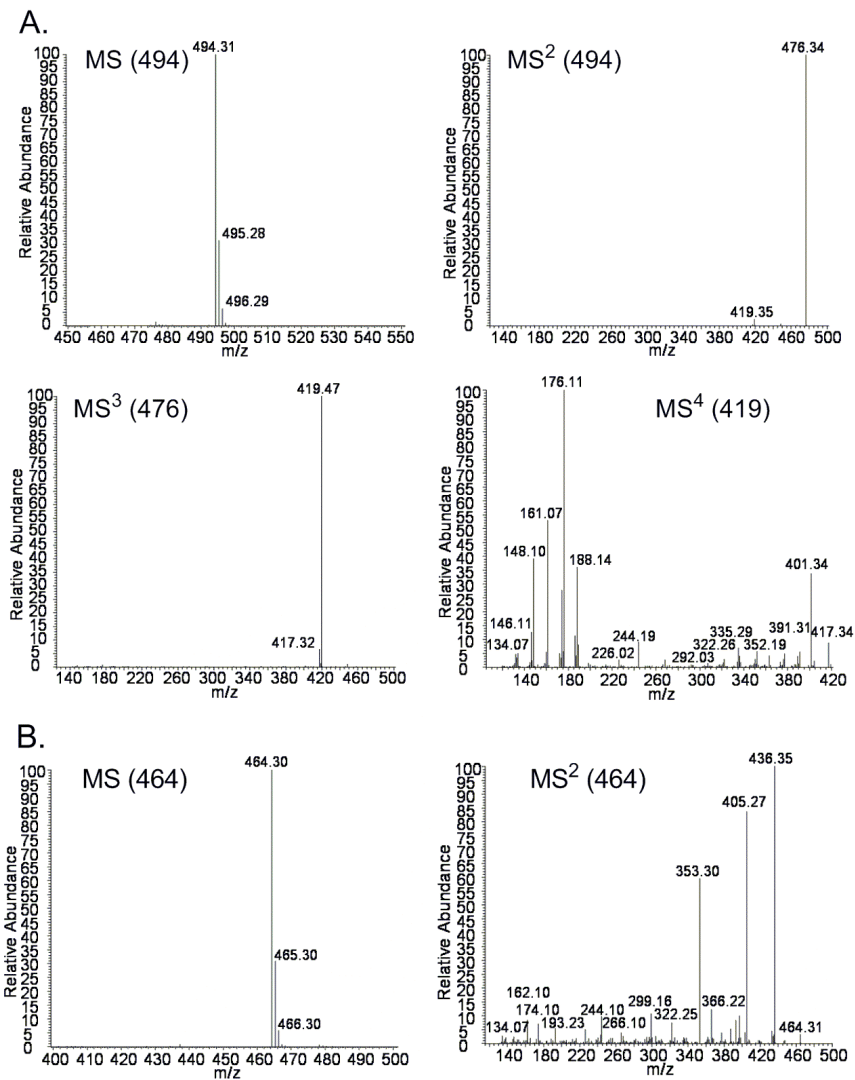

**Figure S1.**  $MS^n$  spectra of authentic paraherquamide A (6) (A) and authentic paraherquamide B (B). These spectra were used to identify both compounds in extracts from isolations of *P. fellutanum* and *A. japonicus* JV-23.

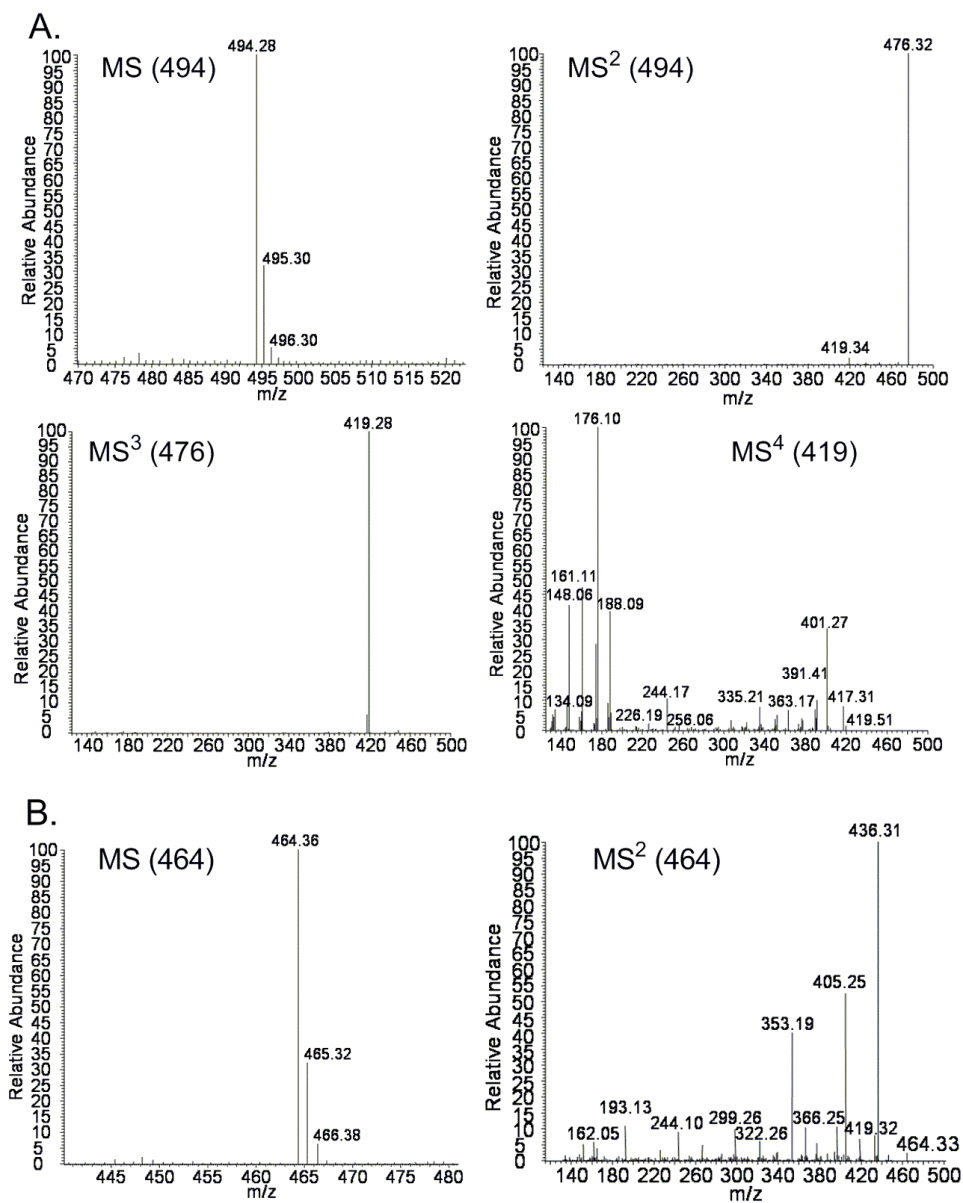

**Figure S2.** MS<sup>n</sup> spectra of two metabolites at 14.45 min (**A**) and at 14.88 min (**B**) from the extract from *A. japonicus* JV-23. These metabolites were identified as paraherquamide A (**6**) (Rt = 14.45 min) and paraherquamide B (Rt = 14.88 min) by comparing their MS<sup>n</sup> spectra to those of authentic compounds.

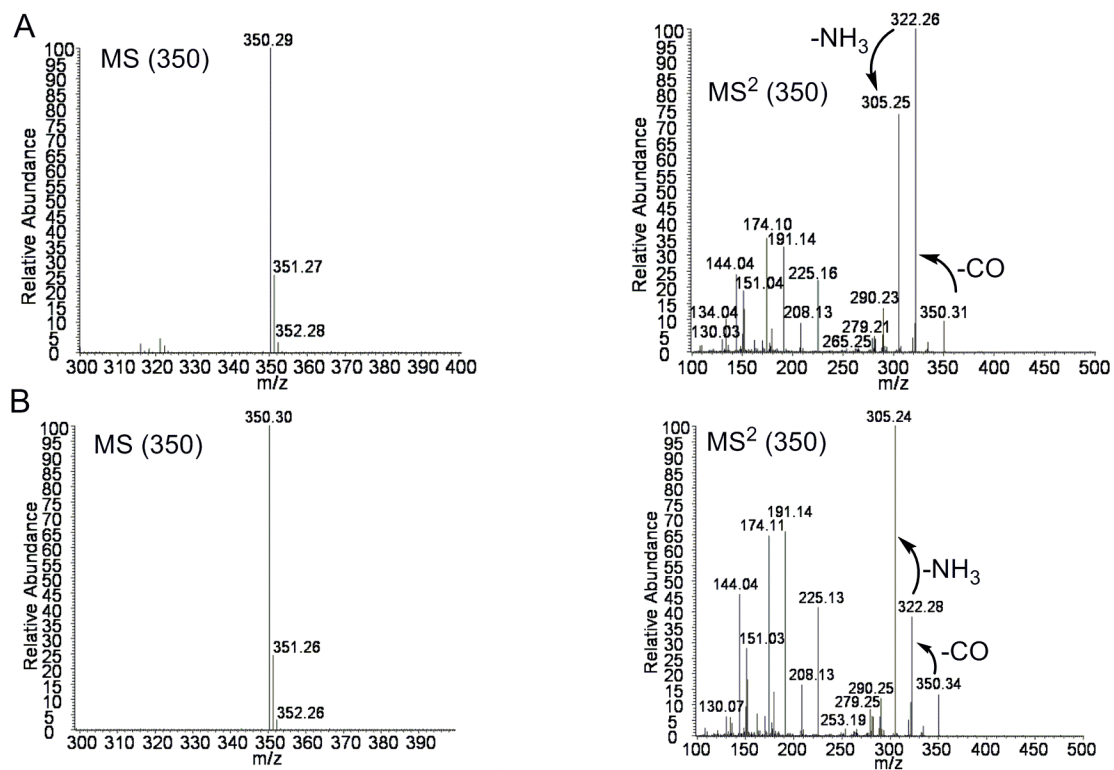

**Figure S3.** MS and MS<sup>2</sup> spectra of authentic VM55599 (**4**) (A) and authentic pre-paraherquamide (**5**) (B). These spectra were used to identify VM55599 (**4**) and pre-paraherquamide (**5**) in extracts from isolations of *P. fellutanum* and *A. japonicus* JV-23.
